# Supplementary material
Source: Springer Nature journal article supplement (https://www.springermedizin.de/resource/supplementary/12943_2010_792_MOESM7_ESM.pdf/9554840)

Lysates

IP pTyr

RPI-1:

- + - +

- + - +

DASATINIB:

- - + +

- - + +

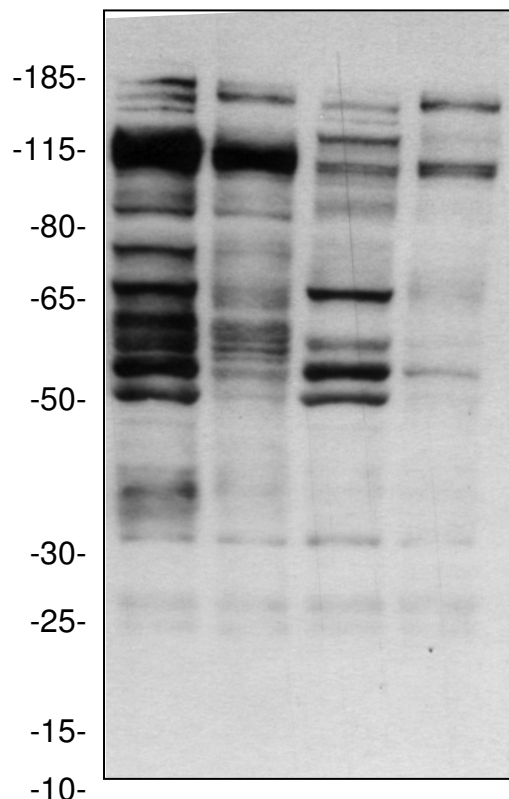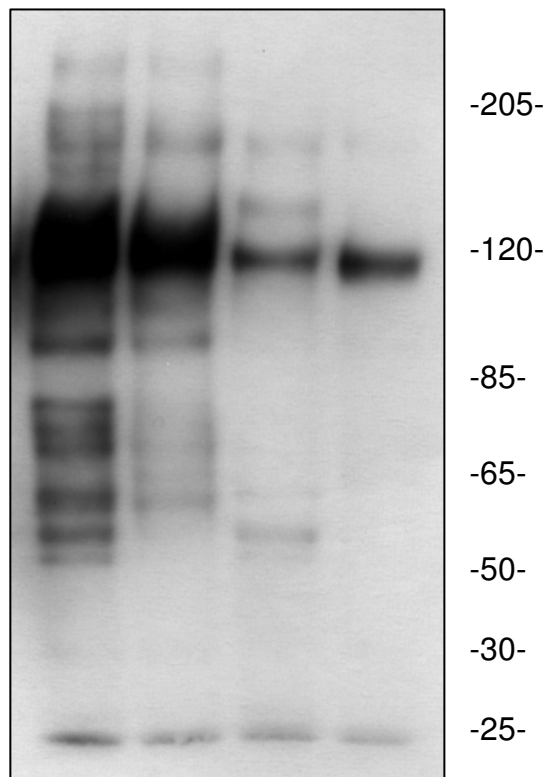

A

B

WB: pTyr

Supplement: MOESM7 [file 9554840]
